# Supplementary material for: Healthy and stable lighting via single-component white perovskite nanoplates
Source: Royal Society of Chemistry journal article supplement (doi:10.1039/d2nr02702j), 2022-01-01
Supplement: d2nr02702j1.pdf [file d2nr02702j1.pdf]

Supporting Information for

## **Healthy and Stable Lighting via Single-Component White Perovskite Nanoplates**

*Hao Cui,<sup>a †</sup> Zhan Su,<sup>a †</sup> Yu Ji,<sup>a †</sup> Tao Lan,<sup>a</sup> Jian-Bin Zhang,<sup>a</sup> Juan Ma,<sup>a</sup> Liu Yang,<sup>a</sup> Yu-Hui Chen,<sup>a</sup> Hao-Ran Shen,<sup>a</sup> Jiaqian Wang,<sup>a</sup> Lihui Liu,<sup>a</sup> Kun Cao,<sup>a</sup> Wei Shen,<sup>a\*</sup> and Shufen Chen<sup>a\*</sup>*

<sup>a</sup> State Key Laboratory of Organic Electronics and Information Displays & Institute of Advanced Materials (IAM), Jiangsu National Synergetic Innovation Center for Advanced Materials (SICAM), Nanjing University of Posts & Telecommunications (NUPT), 9 Wenyuan Road, Nanjing 210023, P. R. China.

*E-mail: iamwshen@njupt.edu.cn, iamsfchen@njupt.edu.cn.*

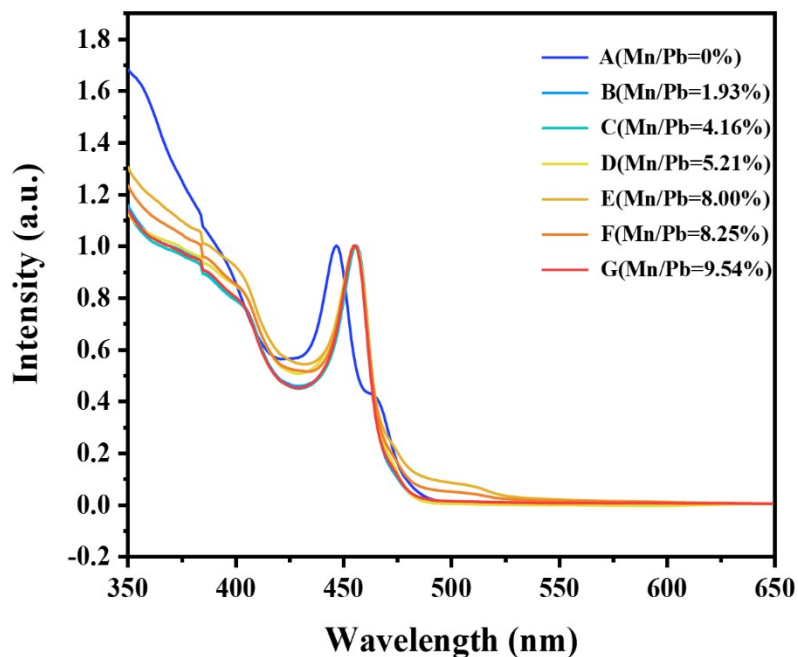

**Figure S1.** UV-vis absorption spectra for  $\text{CsMn}_x\text{Pb}_{1-x}\text{Br}_3$  NPLs.

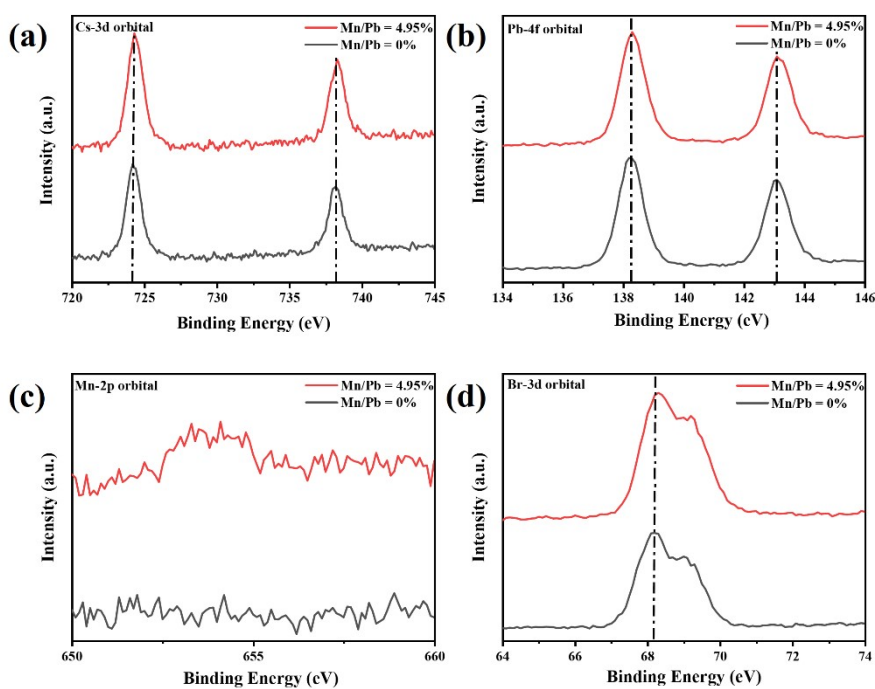

**Figure S2.** Fine XPS spectra of (a) Cs 3d, (b) Pb 4f, (c) Mn 2p, and (d) Br 3d for white (red curve) and blue (black curve) NPLs.

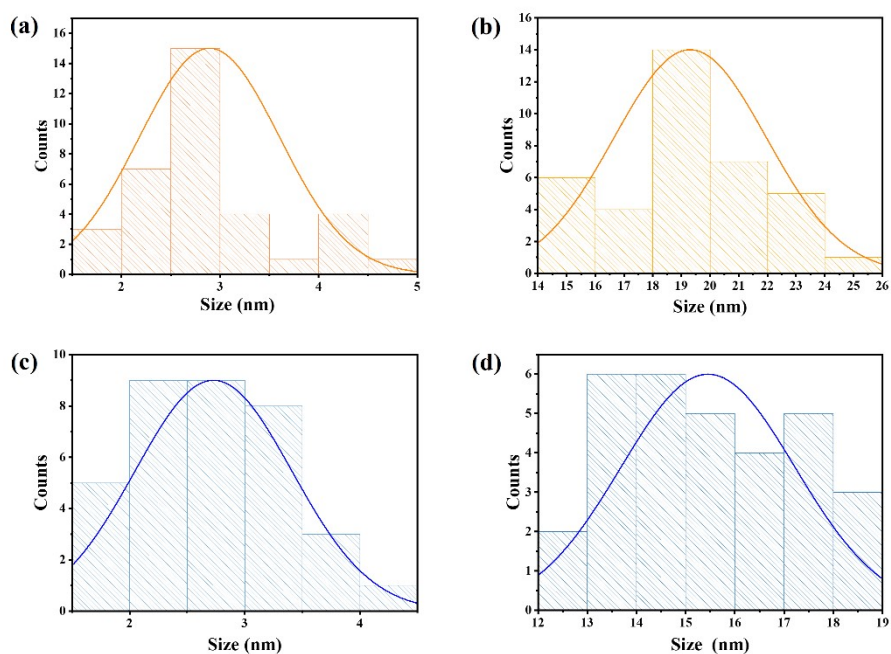

**Figure S3.** Thickness (a) and edge (b) distributions for white NPLs. Thickness (c) and edge (d) distributions for blue NPLs.

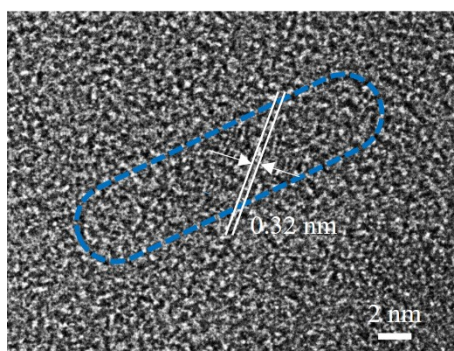

**Figure S4.** HRTEM image for white NPLs.

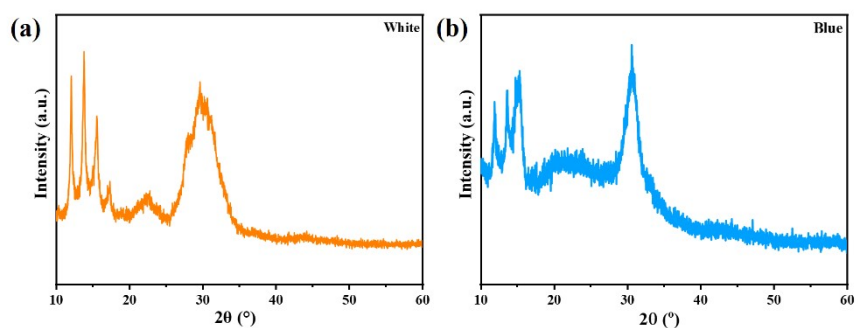

**Figure S5.** XRD patterns of pure white and blue NPLs.

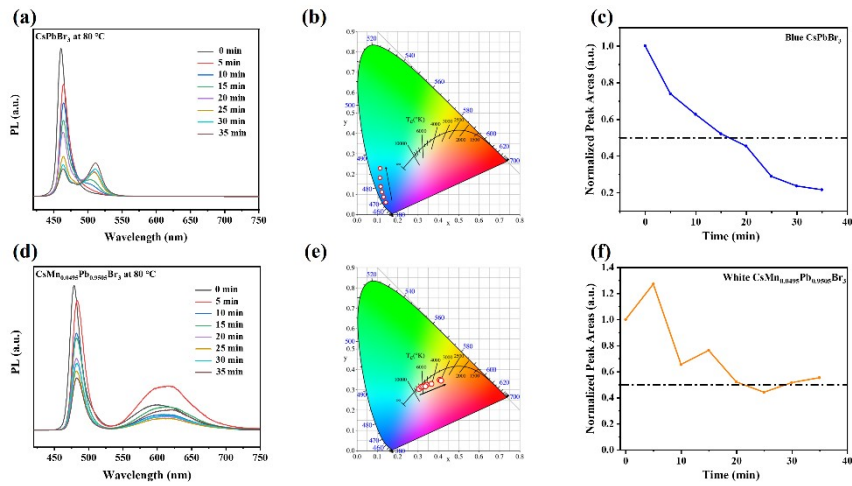

**Figure S6.** (a) PL spectra evolution of blue NPLs at 80 °C. (b) Thermal stability for CIE coordinates of blue NPLs. (c) Blue light component evolution of blue NPLs with time at 80 °C. (d) PL spectra evolution of white NPLs at 80 °C. (e) Thermal stability for CIE coordinates of white NPLs. (f) White light component evolution of white NPLs with time at 80 °C.

**Table S1.** The actual ratios of the Mn/Pb by ICP-MS for different Mn/Pb feed ratios

| Samples | Mn (ppb) | Pb (ppb) | Mn/Pb |
|---------|----------|----------|-------|
| B       | 2.209    | 121.002  | 1.93% |
| C       | 5.794    | 139.126  | 4.16% |
| D       | 8.060    | 154.718  | 5.21% |
| E       | 11.318   | 141.494  | 8.00% |
| F       | 11.345   | 137.490  | 8.25% |
| G       | 11.795   | 123.702  | 9.54% |

**Table S2.** PL lifetime of blue light component for blue and white NPLs

| Samples | $\tau_1$ (ns) | $A_1$ (%) | $\tau_2$ (ns) | $A_2$ (%) | $\tau_{avg}$ (ns) |
|---------|---------------|-----------|---------------|-----------|-------------------|
| A       | 12.93         | 40        | 15.36         | 60        | 14.49             |
| B       | 8.48          | 41        | 12.78         | 59        | 11.42             |
| C       | 7.68          | 26        | 9.52          | 74        | 9.11              |
| D       | 5.57          | /         | /             | /         | 5.57              |
| E       | 5.11          | /         | /             | /         | 5.11              |
| F       | 4.77          | /         | /             | /         | 4.77              |
| G       | 3.96          | /         | /             | /         | 3.96              |

**Table S3.** PL lifetime of orange-red light component for white NPLs

| Samples | $\tau_1$ (ms) | $A_1$ (%) | $\tau_2$ (ms) | $A_2$ (%) | $\tau_{avg}$ (ms) |
|---------|---------------|-----------|---------------|-----------|-------------------|
| A       | 0.00147       | 83        | 0.12505       | 17        | 0.11834           |
| B       | 0.00135       | 44        | 0.21513       | 56        | 0.21408           |

|   |         |    |         |    |         |
|---|---------|----|---------|----|---------|
| C | 0.13133 | 37 | 0.30811 | 63 | 0.27272 |
| D | 0.11332 | 30 | 0.29232 | 70 | 0.26682 |
| E | 0.11906 | 30 | 0.29678 | 70 | 0.27071 |
| F | 0.16050 | 53 | 0.33160 | 47 | 0.27119 |

---
